# Supplementary material
Source: HighWire-hosted journal article supplement (https://err.ersjournals.com/content/29/155/190147)

## Supplementary Appendix

**Appendix 1.** The Likert scale and definitions of consensus used throughout the Delphi process.

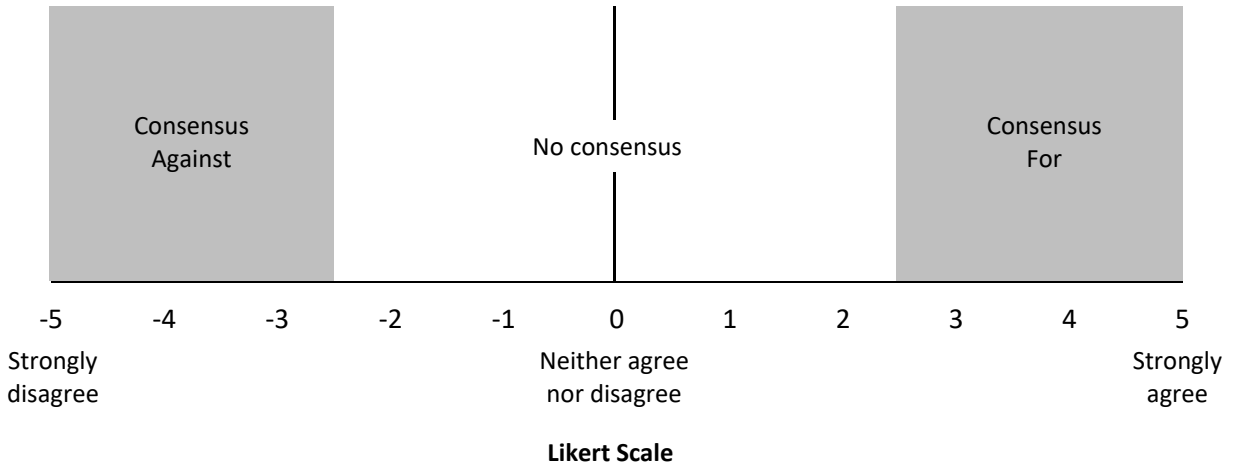

## Appendix 2. RCI Treatment Algorithm Delphi Questionnaire 3 Results

This table contains the questions from the third Delphi questionnaire, the mean and standard deviation of the Likert scale results, and whether consensus was reached or not reached.

| Delphi Statement/Question                                                                                                                                                                                                                                                           | Mean | Std Dev | Consensus |
|-------------------------------------------------------------------------------------------------------------------------------------------------------------------------------------------------------------------------------------------------------------------------------------|------|---------|-----------|
| <b>DOSING</b>                                                                                                                                                                                                                                                                       |      |         |           |
| Since repository corticotrophin injection (RCI) dosing is typically 40–80 units delivered by either intramuscular or subcutaneous injection every 24–72 hours, it is possible to individualize the dosage according to the patient’s medical condition as well as disease severity. |      |         |           |
| <b>Initiating Therapy</b>                                                                                                                                                                                                                                                           |      |         |           |
| 1. For most pulmonary sarcoidosis patients, the initial RCI dose should be                                                                                                                                                                                                          |      |         |           |
| 1a. 80U sq q72h                                                                                                                                                                                                                                                                     | −0.4 | 2.6     | No        |
| 1b. 80U twice weekly                                                                                                                                                                                                                                                                | 1.4  | 2.6     | No        |
| 1c. 40U daily, titrated down if response occurs                                                                                                                                                                                                                                     | −2.1 | 2.2     | No        |
| 1d. 40U three times weekly                                                                                                                                                                                                                                                          | 0.3  | 2.9     | No        |
| 1e. 40U sq q72h                                                                                                                                                                                                                                                                     | 1.0  | 3.0     | No        |
| 1f. 40U twice weekly                                                                                                                                                                                                                                                                | 3.0  | 2.1     | For       |
| 2. General dosing issues                                                                                                                                                                                                                                                            |      |         |           |
| 2a. Most patients with less active disease should receive a lower initial RCI dose, eg 40U twice weekly                                                                                                                                                                             | 2.7  | 2.3     | For       |
| 2b. Most patients with more active disease should receive a higher initial RCI dose, eg 80U twice weekly                                                                                                                                                                            | 1.1  | 3.1     | No        |
| 2c. The initial RCI dose should be determined based on patient body weight                                                                                                                                                                                                          | −0.3 | 2.4     | No        |
| 3. For patients who have had concerning adverse reactions to other medications, the dose should be decreased to 40U twice weekly                                                                                                                                                    | 1.3  | 2.4     | No        |
| 4. For patients with ocular sarcoidosis, the initial RCI dose should be 80U twice weekly                                                                                                                                                                                            | 1.8  | 2.2     | No        |
| 5. A loading dose is needed when initiating RCI                                                                                                                                                                                                                                     | −1.5 | 2.8     | No        |
| <b>Maintenance Therapy</b>                                                                                                                                                                                                                                                          |      |         |           |
| 6. RCI should be continued as a maintenance dose for most patients who respond to RCI                                                                                                                                                                                               | 3.2  | 1.8     | For       |
| 7. RCI should be continued at a maintenance dose for patients with chronic refractory sarcoidosis who respond to RCI                                                                                                                                                                | 3.5  | 1.7     | For       |
| 8. The maintenance dose should be determined individually for each patient                                                                                                                                                                                                          | 3.2  | 1.5     | For       |

|                                                                                                                                                           |     |     |    |
|-----------------------------------------------------------------------------------------------------------------------------------------------------------|-----|-----|----|
| 9. The maintenance dose should be determined by starting at a low RCI dose (eg 40U twice weekly) and titrating up until satisfactory response is achieved | 0.5 | 2.4 | No |
|-----------------------------------------------------------------------------------------------------------------------------------------------------------|-----|-----|----|

|                                                                                                                              |     |     |    |
|------------------------------------------------------------------------------------------------------------------------------|-----|-----|----|
| 10. The maintenance dose should be determined by starting at a high RCI dose and titrating down to the lowest effective dose | 1.5 | 1.9 | No |
|------------------------------------------------------------------------------------------------------------------------------|-----|-----|----|

### Concomitant Steroids

|                                                                                              |     |     |     |
|----------------------------------------------------------------------------------------------|-----|-----|-----|
| 11. In patients receiving RCI and concomitant steroids, steroids should be tapered or weaned | 4.2 | 1.4 | For |
|----------------------------------------------------------------------------------------------|-----|-----|-----|

|                                                                           |     |     |     |
|---------------------------------------------------------------------------|-----|-----|-----|
| 12. Weaning or tapering of steroids should be done as rapidly as possible | 2.8 | 2.2 | For |
|---------------------------------------------------------------------------|-----|-----|-----|

|                                                                                          |      |     |    |
|------------------------------------------------------------------------------------------|------|-----|----|
| 13. Weaning or tapering of steroids should be started 2-3 months after initiation of RCI | -1.6 | 2.9 | No |
|------------------------------------------------------------------------------------------|------|-----|----|

### RCI Dose Reduction or Discontinuation

|                                                       |  |  |  |
|-------------------------------------------------------|--|--|--|
| 14. The RCI dose should be reduced or discontinued if |  |  |  |
|-------------------------------------------------------|--|--|--|

|                                              |     |     |     |
|----------------------------------------------|-----|-----|-----|
| 14a. Excessive RCI-related toxicity develops | 4.3 | 1.4 | For |
|----------------------------------------------|-----|-----|-----|

|                                  |     |     |     |
|----------------------------------|-----|-----|-----|
| 14b. Significant oedema develops | 3.3 | 1.4 | For |
|----------------------------------|-----|-----|-----|

|                                                           |     |     |     |
|-----------------------------------------------------------|-----|-----|-----|
| 14c. Hyperglycaemia and/or diabetic complications develop | 3.0 | 1.3 | For |
|-----------------------------------------------------------|-----|-----|-----|

|                         |     |     |    |
|-------------------------|-----|-----|----|
| 14d. Infection develops | 2.0 | 2.5 | No |
|-------------------------|-----|-----|----|

|                                                                                    |  |  |  |
|------------------------------------------------------------------------------------|--|--|--|
| 14e. Psychiatric adverse events occur (eg suicidal thoughts, agitation, psychosis) |  |  |  |
|------------------------------------------------------------------------------------|--|--|--|

|                                                                                          |     |     |     |
|------------------------------------------------------------------------------------------|-----|-----|-----|
| 14f. Major steroid side effects develop (eg cushingoid features, increased pigmentation) | 3.4 | 1.6 | For |
|------------------------------------------------------------------------------------------|-----|-----|-----|

|                                      |     |     |     |
|--------------------------------------|-----|-----|-----|
| 14g. RCI-related costs are excessive | 2.8 | 2.0 | For |
|--------------------------------------|-----|-----|-----|

|                                                                                     |     |     |     |
|-------------------------------------------------------------------------------------|-----|-----|-----|
| 14h. Response to RCI is lost (symptoms or signs progress after an initial response) | 3.0 | 1.7 | For |
|-------------------------------------------------------------------------------------|-----|-----|-----|

|                                                       |     |     |     |
|-------------------------------------------------------|-----|-----|-----|
| 14i. RCI is ineffective in achieving goals of therapy | 3.2 | 1.9 | For |
|-------------------------------------------------------|-----|-----|-----|

|                                                                              |  |  |  |
|------------------------------------------------------------------------------|--|--|--|
| 15. RCI should be considered ineffective if symptoms or signs do not improve |  |  |  |
|------------------------------------------------------------------------------|--|--|--|

|                        |      |     |    |
|------------------------|------|-----|----|
| 15a. Within 1-2 months | -1.8 | 1.5 | No |
|------------------------|------|-----|----|

|                                    |     |     |    |
|------------------------------------|-----|-----|----|
| 15b. Within approximately 3 months | 1.8 | 2.7 | No |
|------------------------------------|-----|-----|----|

|                        |     |     |     |
|------------------------|-----|-----|-----|
| 15c. Within 3-6 months | 3.3 | 2.7 | For |
|------------------------|-----|-----|-----|

|                       |     |     |    |
|-----------------------|-----|-----|----|
| 15d. Within 12 months | 2.8 | 4.0 | No |
|-----------------------|-----|-----|----|

### Weaning RCI

|                                               |  |  |  |
|-----------------------------------------------|--|--|--|
| 16. The patient should be weaned from RCI if: |  |  |  |
|-----------------------------------------------|--|--|--|

|                                                               |     |     |    |
|---------------------------------------------------------------|-----|-----|----|
| 16a. The disease is stable and well-controlled for 3-6 months | 0.0 | 2.6 | No |
|---------------------------------------------------------------|-----|-----|----|

|                                                                |     |     |     |
|----------------------------------------------------------------|-----|-----|-----|
| 16b. The disease is stable and well-controlled for 6-12 months | 3.1 | 1.7 | For |
|----------------------------------------------------------------|-----|-----|-----|

|                                                               |      |     |    |
|---------------------------------------------------------------|------|-----|----|
| 16c. The disease is stable and well-controlled for 1-3 months | -1.3 | 2.8 | No |
|---------------------------------------------------------------|------|-----|----|

|                                                                                                                        |     |     |     |
|------------------------------------------------------------------------------------------------------------------------|-----|-----|-----|
| 17. RCI should be weaned by decreasing the dosing frequency, then decreasing the dose, then stopping                   | 2.6 | 1.9 | For |
| 18. RCI should be weaned by gradually decreasing the dose, then stopping                                               | 1.4 | 2.3 | No  |
| 19. Weaning RCI by decreasing the frequency, then decreasing dose is preferable to weaning by just decreasing the dose | 0.0 | 2.4 | No  |

#### Route of Administration

|                                                                                        |     |     |     |
|----------------------------------------------------------------------------------------|-----|-----|-----|
| 20. For most patients, RCI should be administered by subcutaneous injection            | 4.0 | 1.6 | For |
| 21. RCI may be administered by intramuscular injection if subcutaneous injection fails | 3.1 | 1.8 | For |

#### Testing and Dosing in Special Populations

|                                                                                                                                                 |      |     |     |
|-------------------------------------------------------------------------------------------------------------------------------------------------|------|-----|-----|
| 22. The following tests should be done (or recent results should be available) before initiating RCI:                                           |      |     |     |
| 22a. Complete blood count (CBC)                                                                                                                 | 2.7  | 2.3 | For |
| 22b. Comprehensive metabolic panel (CMP)                                                                                                        | 3.3  | 2.4 | For |
| 22c. Liver function tests                                                                                                                       | 2.5  | 2.9 | No  |
| 22d. HbA1C levels                                                                                                                               | 2.3  | 1.9 | No  |
| 22e. Bone density scan (DEXA)                                                                                                                   | 2.8  | 1.7 | For |
| 22f. Tuberculosis                                                                                                                               | 2.2  | 2.8 | No  |
| 22g. Hepatitis B and C                                                                                                                          | 1.7  | 2.8 | No  |
| 22h. HIV                                                                                                                                        | 0.8  | 2.9 | No  |
| 22i. TSH                                                                                                                                        | 1.8  | 2.7 | No  |
| 23. Tuberculosis screening before initiating RCI can use the following test(s):                                                                 |      |     |     |
| 23a. No specific screening is required                                                                                                          | 0.8  | 3.2 | No  |
| 23b. Screening is only needed if the patient has risk factors, eg history of TB, history of TB exposure, or on relevant concomitant medications | 1.0  | 2.7 | No  |
| 23c. Close monitoring with no specific test                                                                                                     | 0.3  | 2.7 | No  |
| 23d. Tuberculin                                                                                                                                 | -0.2 | 2.9 | No  |
| 23e. Interferon gamma                                                                                                                           | 0.2  | 3.6 | No  |
| 23f. Quantiferon Gold                                                                                                                           | 2.1  | 2.9 | No  |
| 23g. Chest x-ray                                                                                                                                | 1.5  | 3.1 | No  |
| 23h. Please list any other appropriate TB screening tests                                                                                       | -1.1 | 2.4 | No  |
| 23i. No specific screening is required                                                                                                          | -1.0 | 3.1 | No  |
| 24. The following conditions are contraindications to RCI:                                                                                      |      |     |     |
| 24a. Latent TB                                                                                                                                  | 1.3  | 2.2 | No  |
| 24b. Hypothyroidism                                                                                                                             | -0.7 | 2.6 | No  |

|                                                                                                                                   |      |     |     |
|-----------------------------------------------------------------------------------------------------------------------------------|------|-----|-----|
| 24c. Decompensated cirrhosis                                                                                                      | 1.1  | 2.7 | No  |
| 24d. Any cirrhosis                                                                                                                | -0.5 | 2.3 | No  |
| 24e. Primary adrenocortical insufficiency                                                                                         | 2.3  | 1.7 | No  |
| 24f. Adrenocortical hyperfunction                                                                                                 | 1.9  | 2.2 | No  |
| 24g. Untreated osteoporosis                                                                                                       | 1.1  | 2.2 | No  |
| 24h. Any osteoporosis                                                                                                             | -0.2 | 2.6 | No  |
| 24i. Uncontrolled systemic fungal infection                                                                                       | 4.0  | 1.4 | For |
| 24j. Any systemic fungal infection                                                                                                | 2.5  | 1.7 | No  |
| 24k. Uncontrolled ocular herpes simplex infection                                                                                 | 3.8  | 1.4 | For |
| 24l. Any ocular herpes simplex infection                                                                                          | 2.1  | 2.4 | No  |
| 24m. Recent surgery                                                                                                               | 0.4  | 2.5 | No  |
| 24n. Treated/controlled peptic ulcer                                                                                              | -1.2 | 2.4 | No  |
| 24o. Any peptic ulcer                                                                                                             | -0.2 | 2.2 | No  |
| 24p. Decompensated / uncontrolled congestive heart failure                                                                        | 1.8  | 2.0 | No  |
| 24q. Any congestive heart failure                                                                                                 | 0.0  | 2.0 | No  |
| 24r. Uncontrolled hypertension                                                                                                    | 1.0  | 2.4 | No  |
| 24s. Any hypertension                                                                                                             | -1.2 | 2.2 | No  |
| 24t. Scleroderma                                                                                                                  | 0.8  | 3.2 | No  |
| 24u. Sensitivity to proteins of porcine origin                                                                                    | 3.8  | 1.5 | For |
| 24v. Severe or brittle diabetes                                                                                                   | 2.9  | 1.7 | For |
| 24w. Insulin requiring diabetes                                                                                                   | 1.3  | 2.1 | No  |
| 24x. Patient difficulty with or dislike of self-injection                                                                         | 1.7  | 2.1 | No  |
| 24y. Pre-existing osteoporosis and hypertension are acceptable if monitored and the patient is on medication for these conditions | 2.1  | 3.2 | No  |

### Adverse Effect Management

Effective management of the adverse events (AE) associated with RCI is important to promote adherence and thereby improve outcomes. However, little or no published guidance on AE management is available. This portion of the questionnaire focuses on the prevention and management of common and/or important RCI-related adverse events.

Note that many AEs associated with RCI, particularly near the time of RCI administration, are similar to those associated with high-dose steroids. In answering the following questions, please focus on RCI-specific AEs.

#### Oedema

25. Non-Pharmacological Management of new/worsening oedema should include

|                                         |     |     |     |
|-----------------------------------------|-----|-----|-----|
| 25a. Evaluate/diagnose potential causes | 4.4 | 1.4 | For |
| 25b. Limit salt intake                  | 4.0 | 1.5 | For |

|                                                                                                                     |     |     |     |
|---------------------------------------------------------------------------------------------------------------------|-----|-----|-----|
| 25c. Elevation                                                                                                      | 3.7 | 1.4 | For |
| 26. Pharmacological Management of new/worsening oedema should include                                               |     |     |     |
| 26a. Initiate diuretics                                                                                             | 3.6 | 1.6 | For |
| 26b. Loop diuretics (Lasix, etc.)                                                                                   | 2.9 | 1.9 | For |
| 26c. Spironolactone (Aldactone)                                                                                     | 2.8 | 1.9 | For |
| 27. RCI Dose Adjustment                                                                                             |     |     |     |
| 27a. Dose down titration after pharmacological and non-pharmacological interventions fail                           | 3.6 | 1.4 | For |
| 27b. Dose down titration concomitant to pharmacological and non-pharmacological interventions due to severity of AE | 2.9 | 1.6 | For |
| 27c. Medication discontinuation if other interventions fail                                                         | 3.0 | 2.4 | For |
| 27d. Medication discontinuation if AE is severe and significant                                                     | 4.3 | 1.5 | For |
| 27e. Re-up titration or resumption of medication at lower dose once symptoms resolve                                | 2.4 | 1.7 | No  |

### **Anxiety/Depression**

|                                                                                                                     |      |     |     |
|---------------------------------------------------------------------------------------------------------------------|------|-----|-----|
| 28. Non-Pharmacological Management of new/worsening anxiety/depression should include                               |      |     |     |
| 28a. Refer to PCP/psychiatry                                                                                        | 2.7  | 2.6 | For |
| 29. Pharmacological Management of new/worsening anxiety/depression should include                                   |      |     |     |
| 29a. Anxiolytic therapy                                                                                             | 1.0  | 1.6 | No  |
| 29b. Anti-depressant therapy (eg SSRI)                                                                              | 1.8  | 1.8 | No  |
| 29c. Antipsychotic medication                                                                                       | -0.7 | 2.3 | No  |
| 30. RCI Dose Adjustment                                                                                             |      |     |     |
| 30a. Dose down titration after pharmacological and non-pharmacological interventions fail                           | 3.5  | 1.6 | For |
| 30b. Dose down titration concomitant to pharmacological and non-pharmacological interventions due to severity of AE | 3.5  | 1.6 | For |
| 30c. Medication discontinuation if other interventions fail                                                         | 4.1  | 1.6 | For |
| 30d. Medication discontinuation if AE is severe and significant                                                     | 4.3  | 1.5 | For |
| 30e. Re-up titration or resumption of medication at lower dose once symptoms resolve                                | 0.7  | 2.7 | No  |

### **Infection**

|                                                            |     |     |     |
|------------------------------------------------------------|-----|-----|-----|
| 31. Pharmacological Management of Infection should include |     |     |     |
| 31a. First-line treatment of the specific infection        | 4.4 | 1.5 | For |

|                                                                                                                                    |      |     |     |
|------------------------------------------------------------------------------------------------------------------------------------|------|-----|-----|
| 31b. Second-line treatment of the specific infection                                                                               | 3.5  | 1.7 | For |
| 31c. Switch to IV steroid from Acthar gel                                                                                          | -0.5 | 2.0 | No  |
| 31d. Steroids are only used if there is concern about adrenal insufficiency or patient had severe organ (life threatening) disease | 1.9  | 1.7 | No  |
| <b>32. RCI Dose Adjustment</b>                                                                                                     |      |     |     |
| 32a. Dose down titration after pharmacological interventions fail                                                                  | 2.4  | 3.0 | No  |
| 32b. Dose down titration concomitant to pharmacologic interventions due to severity of AE                                          | 3.8  | 1.5 | For |
| 32c. Medication discontinuation if other interventions fail                                                                        | 3.9  | 1.5 | For |
| 32d. Medication discontinuation if AE is severe and significant                                                                    | 4.2  | 1.5 | For |
| 32e. Re-up titration or resumption of medication at lower dose once symptoms resolve                                               | 2.3  | 2.0 | No  |
| <b>Increased appetite/weight gain</b>                                                                                              |      |     |     |
| <b>33. Non-Pharmacological Management if the patient develops increased appetite and weight gain should include</b>                |      |     |     |
| 33a. Behavioural intervention                                                                                                      | 4.3  | 1.5 | For |
| 33b. Dietary counselling                                                                                                           | 4.2  | 1.5 | For |
| 33c. Exercise program                                                                                                              | 4.1  | 1.4 | For |
| 33d. Pulmonary rehabilitation                                                                                                      | 3.5  | 1.9 | For |
| <b>34. Pharmacological Management if the patient develops increased appetite and weight gain should include</b>                    |      |     |     |
| 34a. First line—Appetite suppressants                                                                                              | -0.5 | 3.5 | No  |
| 34b. Second line—Appetite suppressants                                                                                             | -1.3 | 3.1 | No  |
| 34c. Shorten the counselling interval                                                                                              | 0.4  | 3.5 | No  |
| <b>35. RCI Dose Adjustment</b>                                                                                                     |      |     |     |
| 35a. Dose down titration after pharmacological and non-pharmacological interventions fail                                          | 2.9  | 1.6 | For |
| 35b. Dose down titration concomitant to pharmacologic and non-pharmacological interventions due to severity of AE                  | 3.4  | 1.8 | For |
| 35c. Medication discontinuation if other interventions fail                                                                        | 3.3  | 1.7 | For |
| 35d. Medication discontinuation if AE is severe and significant                                                                    | 4.0  | 1.5 | For |
| 35e. Re-up titration or resumption of medication at lower dose once symptoms resolve                                               | 1.6  | 1.6 | No  |

**Glucose intolerance/worsening in glucose control**

|                                                                                                                        |     |     |     |
|------------------------------------------------------------------------------------------------------------------------|-----|-----|-----|
| 36. Pharmacological Management if the patient develops glucose intolerance/worsening in glucose control should include |     |     |     |
| 36a. Manage glucose with metformin                                                                                     | 2.3 | 1.5 | No  |
| 36b. Manage glucose with insulin                                                                                       | 2.3 | 1.4 | No  |
| 36c. Manage glucose with other oral agents                                                                             | 2.2 | 1.3 | No  |
| 36d. Same as with oral steroids                                                                                        | 3.0 | 1.4 | For |
| 37. RCI Dose Adjustment                                                                                                |     |     |     |
| 37a. Dose down titration after pharmacological interventions fail                                                      | 3.1 | 1.3 | For |
| 37b. Dose down titration concomitant to pharmacologic interventions due to severity of AE                              | 3.1 | 1.6 | For |
| 37c. Medication discontinuation if other interventions fail                                                            | 3.0 | 1.7 | For |
| 37d. Medication discontinuation if AE is severe and significant                                                        | 3.9 | 1.6 | For |
| 37e. Re-up titration or resumption of medication at lower dose once symptoms resolve                                   | 1.8 | 1.8 | No  |

### **Hypertension**

|                                                                                                                   |     |     |     |
|-------------------------------------------------------------------------------------------------------------------|-----|-----|-----|
| 38. Non-Pharmacological Management if the patient develops hypertension should include                            |     |     |     |
| 38a. Educate on sodium and fluids                                                                                 | 4.3 | 1.4 | For |
| 38b. Refer to PCP                                                                                                 | 3.5 | 1.9 | For |
| 39. Pharmacological Management if the patient develops hypertension should include                                |     |     |     |
| 39a. First line—Antihypertensive medication                                                                       | 3.7 | 1.5 | For |
| 39b. Second line—Add or increase antihypertensive medication                                                      | 3.1 | 1.3 | For |
| 40. RCI Dose Adjustment                                                                                           |     |     |     |
| 40a. Dose down titration after pharmacological and non-pharmacological interventions fail                         | 3.1 | 1.6 | For |
| 40b. Dose down titration concomitant to pharmacologic and non-pharmacological interventions due to severity of AE | 3.6 | 1.4 | For |
| 40c. Medication discontinuation if other interventions fail                                                       | 3.3 | 1.5 | For |
| 40d. Medication discontinuation if AE is severe and significant                                                   | 3.8 | 1.7 | For |
| 40e. Re-up titration or resumption of medication at lower dose once symptoms resolve                              | 1.7 | 1.7 | No  |

### **Darkening of the Skin**

41. Non-pharmacological and pharmacological management if the patient develops darkening of the skin should include



|                                                                                                                   |     |     |           |
|-------------------------------------------------------------------------------------------------------------------|-----|-----|-----------|
| 41a. Counselling for patient                                                                                      | 4.1 | 1.5 | For       |
| 41b. Topical skin therapies                                                                                       | 2.3 | 2.2 | No        |
| <b>42. RCI Dose Adjustment</b>                                                                                    |     |     |           |
| 42a. Dose down titration after pharmacological and non-pharmacological interventions fail                         | 2.7 | 1.9 | For       |
| 42b. Dose down titration concomitant to pharmacologic and non-pharmacological interventions due to severity of AE | 3.0 | 2.5 | For       |
| 42c. Medication discontinuation if other interventions fail                                                       | 2.5 | 1.7 | No        |
| 42d. Medication discontinuation if AE is severe and significant                                                   | 3.7 | 1.3 | For       |
| 42e. Re-up titration or resumption of medication at lower dose once symptoms resolve                              | 0.5 | 2.6 | No        |
| <b>Other Skin-related AEs</b>                                                                                     |     |     |           |
| <b>43. Non-pharmacological interventions if the patient develops other skin-related AEs should include</b>        |     |     |           |
| 43a. Refer to dermatology                                                                                         | 2.5 | 2.6 | No        |
| 43b. Counselling; encourage patient to complete the course of therapy                                             | 3.3 | 2.3 | For       |
| 43c. Rotate the injection site                                                                                    | 3.8 | 1.5 | For       |
| <b>44. Pharmacological interventions if the patient develops other skin-related AEs should include</b>            |     |     |           |
| 44a. First line—topical skin therapies                                                                            | 3.2 | 1.7 | For       |
| 44b. Second line—reduce RCI dose or frequency                                                                     | 2.8 | 1.4 | For       |
| 44c. Refer to dermatology                                                                                         | 3.1 | 1.8 | For       |
| <b>45. RCI Dose Adjustment</b>                                                                                    |     |     |           |
| 45a. Dose down-titration after pharmacological and non-pharmacological interventions fail                         |     |     | Not asked |
| 45b. Dose down titration concomitant to pharmacologic and non-pharmacological interventions due to severity of AE | 2.7 | 2.1 | For       |
| 45c. Medication discontinuation if other interventions fail                                                       | 1.8 | 2.1 | No        |
| 45d. Medication discontinuation if AE is severe and significant                                                   | 3.9 | 1.6 | For       |
| 45e. Re-up titration or resumption of medication at lower dose once symptoms resolve                              | 2.1 | 1.8 | No        |
| <b>Localized injection site pain</b>                                                                              |     |     |           |
| <b>46. Non-pharmacological management for localised injection site pain should include</b>                        |     |     |           |
| 46a. Cool skin with an ice pack                                                                                   | 4.1 | 1.5 | For       |

|                                                                                                                   |     |     |     |
|-------------------------------------------------------------------------------------------------------------------|-----|-----|-----|
| 46b. Rotate injection sites                                                                                       | 4.3 | 1.5 | For |
| 46c. Slower injection rate                                                                                        | 3.4 | 1.8 | For |
| 46d. Educate on injection technique                                                                               | 4.3 | 1.4 | For |
| 46e. Massage the area                                                                                             | 2.8 | 2.1 | For |
| 47. Pharmacological management for localised injection site pain should include                                   |     |     |     |
| 47a. Local anaesthetics (lidocaine/EMLA)                                                                          | 0.7 | 2.0 | No  |
| 47b. Ibuprofen                                                                                                    | 2.2 | 1.5 | No  |
| 48. RCI Dose Adjustment                                                                                           |     |     |     |
| 48a. Dose down titration after pharmacological and non-pharmacological interventions fail                         | 1.3 | 1.1 | No  |
| 48b. Dose down titration concomitant to pharmacologic and non-pharmacological interventions due to severity of AE | 2.6 | 1.4 | For |
| 48c. Medication discontinuation if other interventions fail                                                       | 2.4 | 1.4 | No  |
| 48d. Medication discontinuation if AE is severe and significant                                                   | 3.7 | 1.4 | For |
| 48e. Re-up titration or resumption of medication at lower dose once symptoms resolve                              | 2.5 | 1.7 | No  |
| <b>Insomnia</b>                                                                                                   |     |     |     |
| 49. Non-pharmacological management for insomnia should include                                                    |     |     |     |
| 49a. Sleep hygiene                                                                                                | 4.2 | 1.4 | For |
| 49b. Mindfulness techniques/meditation                                                                            | 4.0 | 1.5 | For |
| 50. Pharmacological management for insomnia should include                                                        |     |     |     |
| 50a. OTC (eg Benadryl, melatonin)                                                                                 | 3.5 | 1.5 | For |
| 50b. Ambien (zolpidem)                                                                                            | 1.8 | 2.6 | No  |
| 50c. Remeron (mirtazapine)                                                                                        | 2.0 | 2.0 | No  |
| 50d. Trazodone                                                                                                    | 1.1 | 2.4 | No  |
| 50e. Lunesta (eszopiclone)                                                                                        | 1.3 | 2.6 | No  |
| 50f. Klonopin (clonazepam)                                                                                        | 0.6 | 2.4 | No  |
| 50g. Antidepressant or anxiolytics depending on symptoms                                                          | 0.8 | 2.4 | No  |
| 50h. Integrative medicine                                                                                         | 3.0 | 1.8 | For |
| 51. RCI Dose Adjustment                                                                                           |     |     |     |
| 51a. Dose down-titration after pharmacological and non-pharmacological interventions fail                         | 2.0 | 1.5 | No  |
| 51b. Dose down-titration concomitant to pharmacologic and non-pharmacological interventions due to severity of AE | 2.8 | 1.7 | For |

|                                                                                                                        |      |     |     |
|------------------------------------------------------------------------------------------------------------------------|------|-----|-----|
| 51c. Medication discontinuation if other interventions fail                                                            | 2.8  | 2.0 | For |
| 51d. Medication discontinuation if AE is severe and significant                                                        | 3.6  | 1.7 | For |
| 51e. Re-up titration or resumption of medication at lower dose once symptoms resolve                                   | 1.8  | 1.9 | No  |
| Concomitant immunosuppressive medications                                                                              |      |     |     |
| 52. Management of concomitant immunosuppressive medications should include                                             |      |     |     |
| 52a. Monitor as when using steroids                                                                                    | 3.8  | 1.5 | For |
| 52b. Standard of care with the appropriate laboratory and adverse effect management                                    | 4.5  | 1.5 | For |
| 52c. Continue methotrexate or Imuran                                                                                   | 4.0  | 1.5 | For |
| 52d. Attempt to reduce dose as tolerated; starting with prednisone, then other immunosuppressive medications, then RCI | 2.3  | 2.3 | No  |
| 52e. Use RCI to maintain immunosuppression until a concomitant immunosuppressant is on board                           | 3.1  | 1.5 | For |
| 52f. Decrease immunosuppressant dose if possible depending on which medications are used                               | 2.6  | 1.8 | For |
| 52g. Keep DMARDs unchanged while taking RCI                                                                            | 3.2  | 1.6 | For |
| 52h. Maintain dosage unless and until goals are met                                                                    | 3.5  | 1.4 | For |
| 52i. Decrease the dose of concomitant medications                                                                      | 0.1  | 2.6 | No  |
| 53. RCI Dose Adjustment                                                                                                |      |     |     |
| 53a. Dose down titration after concomitant immunosuppressive medications fail                                          | 0.6  | 2.5 | No  |
| 53b. Dose down titration concomitant to immunosuppressive medications due to severity of AE                            | 2.0  | 2.3 | No  |
| 53c. Medication discontinuation if concomitant immunosuppressive medications fail                                      | 0.3  | 2.5 | No  |
| 53d. Medication discontinuation if AE is severe and significant                                                        | 3.1  | 1.6 | For |
| 53e. Re-up titration or resumption of medication at lower dose once symptoms resolve                                   | 1.8  | 1.5 | No  |
| <b>Hospitalisation</b>                                                                                                 |      |     |     |
| 54. Management when patients are hospitalised should include                                                           |      |     |     |
| 54a. Ensure patient receives steroids at a stress dose                                                                 | 3.1  | 1.9 | For |
| 54b. Hold RCI dose                                                                                                     | 0.8  | 2.6 | No  |
| 54c. Continue RCI                                                                                                      | 0.4  | 3.2 | No  |
| Continue RCI unless hospitalisation is for                                                                             | -0.7 | 4.0 | No  |
| 54d. Infection                                                                                                         | 1.5  | 3.1 | No  |

|                                                                                             |     |     |     |
|---------------------------------------------------------------------------------------------|-----|-----|-----|
| 54e. Life-threatening infection                                                             | 3.4 | 3.0 | For |
| 54f. Heart failure                                                                          | 1.7 | 3.3 | No  |
| 54g. Hyperglycaemia                                                                         | 1.8 | 3.3 | No  |
| 54h. Surgery                                                                                | 1.1 | 3.3 | No  |
| 54i. Sepsis                                                                                 | 3.2 | 2.9 | For |
| 54k. Continue to hold RCI until discharge                                                   | 0.7 | 3.6 | No  |
| 54l. Hold RCI if any questionable RCI-related cause                                         | 3.3 | 2.9 | For |
| 54m. Stop RCI if needed due to severe exacerbations such as neurosarcoidosis related issues | 2.3 | 2.4 | No  |

### Treatment Practice-specific questions

Note: these questions did not seek consensus

Of the patients with pulmonary sarcoidosis you have treated with RCI,

55. What percent were started on RCI because of **intolerance** to steroids, cytotoxic agents or biologics? 30% 25.41

56. What percent (%) were started on RCI as **second line** to steroids? 36% 37.47

57. What percent (%) were started on RCI as **third line: Combination** of steroids **AND** cytotoxic agents failed? 28% 21.62

58. What percent were started on RCI as **third line: Combination** of steroids **AND** biologics failed? 16% 13.90

59. What percent were started on RCI as **fourth line** therapy: **Combinations** of steroids/cytotoxics and biologics, tried and failed? 14% 14.00

60. When treating for pulmonary sarcoidosis with steroids, cytotoxic agents and biologics, how have you typically paired RCI in combination with these agents?

- Yes
- Usually RCI instead of biologic
- Just added on, then starting tapering steroids rather quickly
- Determine whether patient is benefiting from the combination of drugs. Usually RCI is for advanced, refractory patients.
- RCI+cytotoxic agents
- Steroids, then MTX, then RCI or infliximab
- Have not used this pairing
- If concerned patient constitution not robust enough for steroids, eg HIV, myositis with fear of not weaning from steroids rapidly etc. Steroids and steroid type medications are for quick onset to quell a fire and with simultaneous transition to steroid -sparing agent.
- Similar to corticosteroid use, I pair with MTX or azathioprine or even infliximab.
- Often start the RCI and wean the others
- I start 40 twice weekly in addition to the current steroid dose and MTX or others, I uptitrate the dose if the BP and blood sugar are maintained

- No specific pairings

61. Are there any patient populations or treatment settings where RCI may be appropriate to use concomitantly?

- Most patients using cytotoxic agents as sole therapy may benefit from RCI therapy as concomitant meds
- Patients failing biologics but who still have evidence for inflammation (e.g. positive PET scan)
- Refractory sarcoidosis with progressive decline
- Severe systemic disease such as patients with eye, lung, liver and spleen and bone involvement
- Probably, I just have not
- Concomitantly with steroids? No, only when trying to wean steroids. We don't have these answers yet. I use in HIV patients mostly instead of steroids though there is no good data for this- just hoping for a better, more protective outcome - but it's been a long time
- Not sure
- Severe progressive sarcoidosis
- Appropriate treatment of refractory disease

**Appendix 3.** Consensus recommendations for managing concomitant immunosuppressive medications in patients receiving RCI as therapy for pulmonary sarcoidosis.

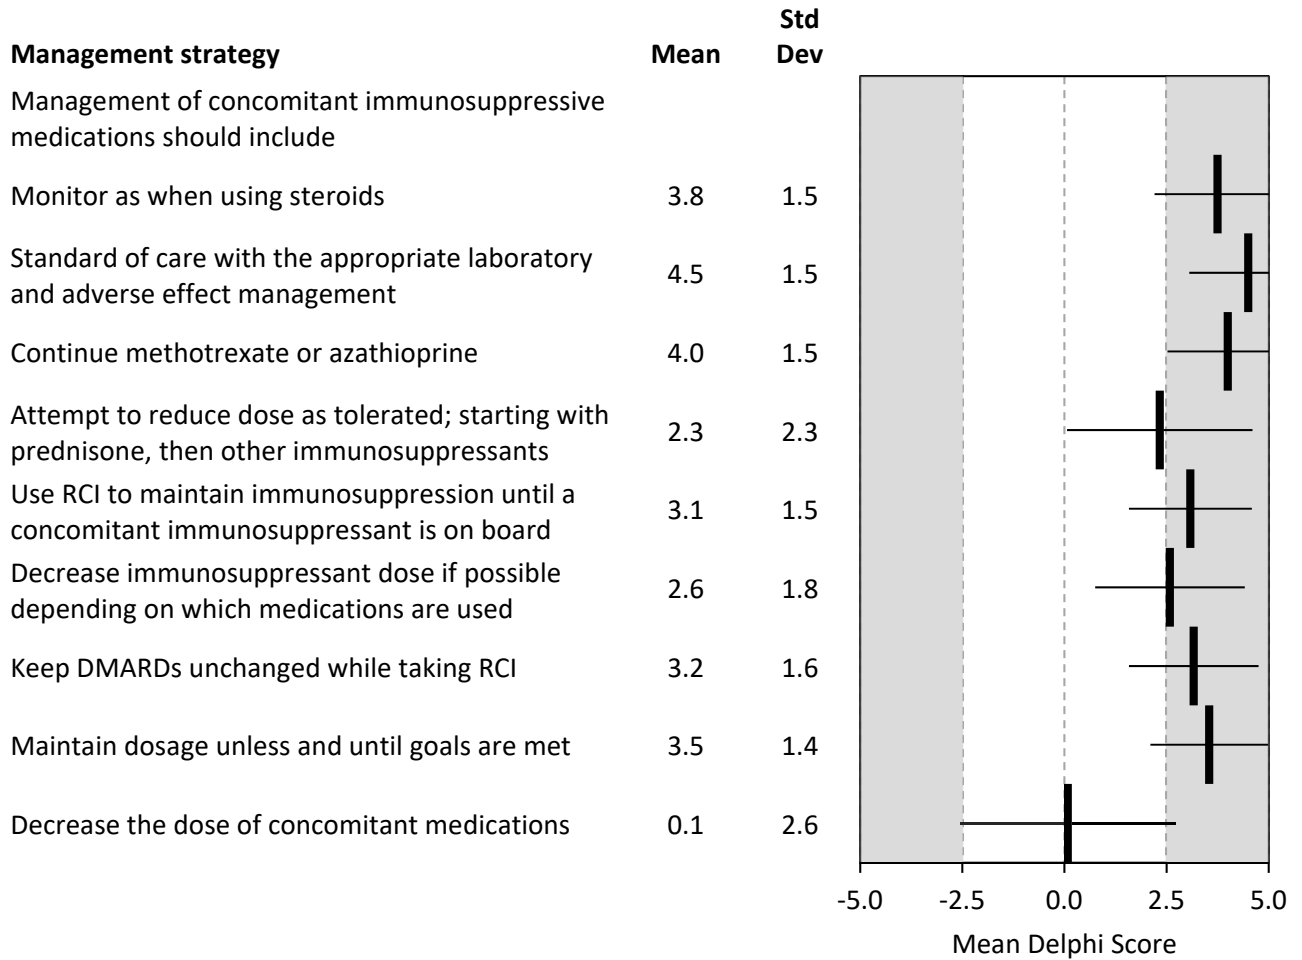

**Appendix 4.** Consensus recommendations for contraindications to RCI therapy in pulmonary sarcoidosis.

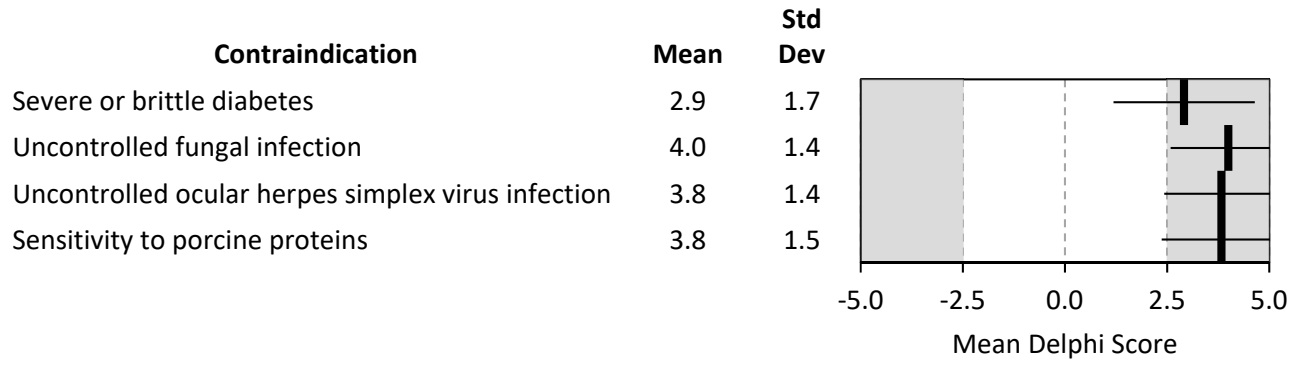

**Appendix 5.** Consensus recommendations for use of RCI as therapy for pulmonary sarcoidosis in hospitalised patients.

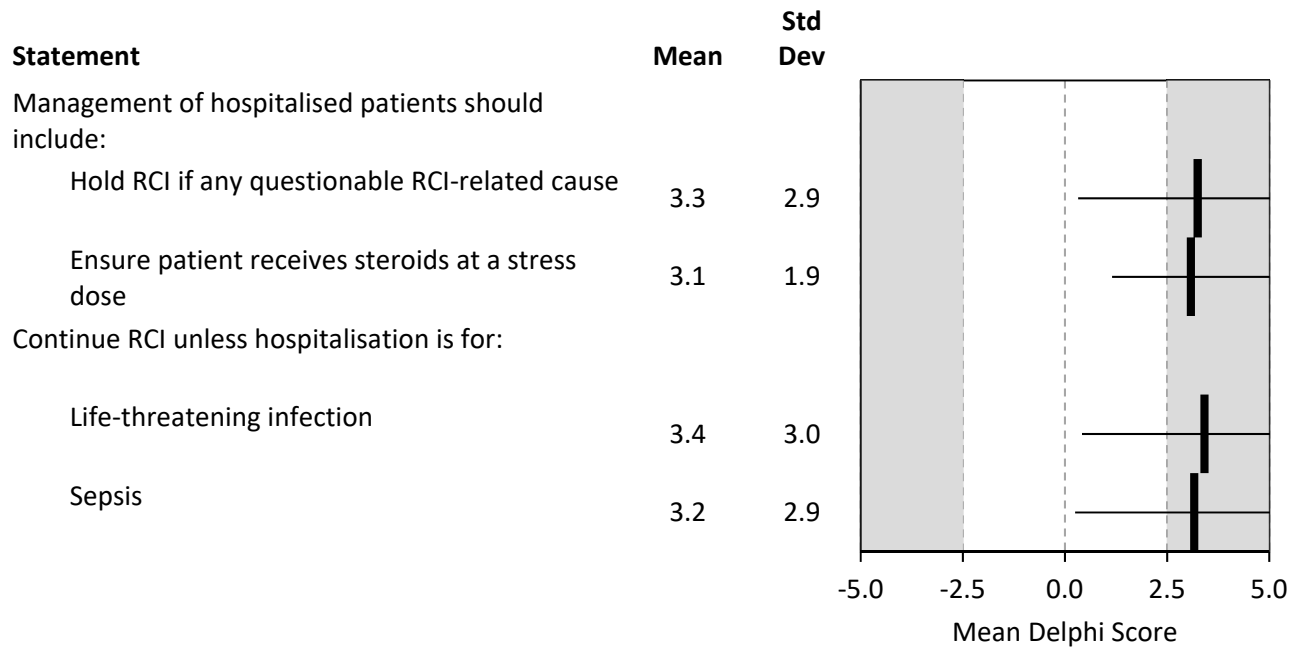

Supplement: inline-supplementary-material-1 [file inline-supplementary-material-1.pdf]
